# Supplementary material for: Varying Responses of Vegetation Greenness to the Diurnal Warming across the Global
Source: MDPI journal article supplement (doi:10.3390/plants11192648), 2022-10-08
Supplement: s1 [file s1]

**Supplementary:**

**Table S1 Slopes of the partial correlation coefficients between mean annual NDVI and the diurnal temperature ( $T_{\max}$  and  $T_{\min}$ ) for each 17-year moving window across latitudes intervals.** (The slope represents the change trend in the correlations between the vegetation greenness and diurnal warming during the period 1982–2015. A positive slope indicates a positive growth response to temperature, while a negative slope indicates a weakening relationship with diurnal warming.  $p$  indicates the statistically significance level of the change trend tested by a two-tailed t-test at the 0.05 level. N and S indicates the Northern and southern hemisphere, respectively.)

| Latitudes    | $R_{\text{NDVI-Tmax}}$ |       | $R_{\text{NDVI-Tmin}}$ |       |
|--------------|------------------------|-------|------------------------|-------|
|              | Slope                  | $p$   | Slpoe                  | $p$   |
| 60° - 90°N   | 0.012                  | 0.209 | -0.023                 | 0.008 |
| 30° - 60°N   | 0.002                  | 0.861 | -0.023                 | 0.124 |
| 00° - 30°N   | -0.014                 | 0.130 | 0.001                  | 0.953 |
| -30° - 00°S  | 0.006                  | 0.351 | -0.021                 | 0.012 |
| -60° - -30°S | -0.051                 | 0.000 | 0.032                  | 0.000 |

**Table S2 Slopes of the partial correlation coefficients between mean NDVI and the diurnal temperature ( $T_{\max}$  and  $T_{\min}$ ) in spring for each 17-year moving window across latitudes intervals.** (The slope represents the change trend in the correlations between the vegetation greenness and diurnal warming during the period 1982–2015. A positive slope indicates a positive growth response to temperature, while a negative slope indicates a weakening relationship with diurnal warming.  $p$  indicates the statistically significance level of the change trend tested by a two-tailed t-test at the 0.05 level. N and S indicates the Northern and southern hemisphere, respectively.)

| Latitudes    | $R_{\text{NDVI-Tmax}}$ |       | $R_{\text{NDVI-Tmin}}$ |       |
|--------------|------------------------|-------|------------------------|-------|
|              | Slope                  | $p$   | Slpoe                  | $p$   |
| 60° - 90°N   | -0.011                 | 0.305 | 0.003                  | 0.722 |
| 30° - 60°N   | -0.031                 | 0.002 | -0.008                 | 0.453 |
| 00° - 30°N   | 0.014                  | 0.073 | -0.040                 | 0.000 |
| -30° - 00°S  | -0.010                 | 0.065 | 0.009                  | 0.178 |
| -60° - -30°S | -0.055                 | 0.000 | 0.035                  | 0.000 |

**Table S3 Slopes of the partial correlation coefficients between mean NDVI and the diurnal temperature ( $T_{\max}$  and  $T_{\min}$ ) in summer for each 17-year moving window across latitudes intervals.** (The slope represents the change trend in the correlations between the vegetation greenness and diurnal warming during the period 1982–2015. A positive slope indicates a positive growth response to temperature, while a negative slope indicates a weakening relationship with diurnal warming.  $p$  indicates the statistically significance level of the change trend tested by a two-tailed t-test at the 0.05 level. N and S indicates the Northern and southern hemisphere, respectively.)

the change trend in the correlations between the vegetation greenness and diurnal warming during the period 1982–2015. A positive slope indicates a positive growth response to temperature, while a negative slope indicates a weakening relationship with diurnal warming.  $p$  indicates the statistically significance level of the change trend tested by a two-tailed  $t$ -test at the 0.05 level. N and S indicates the Northern and southern hemisphere, respectively.)

| Latitudes    | $R_{NDVI-T_{max}}$ |       | $R_{NDVI-T_{min}}$ |       |
|--------------|--------------------|-------|--------------------|-------|
|              | Slope              | $p$   | Slope              | $p$   |
| 60° - 90°N   | 0.010              | 0.267 | -0.022             | 0.001 |
| 30° - 60°N   | -0.001             | 0.839 | -0.007             | 0.387 |
| 00° - 30°N   | -0.020             | 0.037 | -0.001             | 0.917 |
| -30° - 00°S  | 0.029              | 0.002 | 0.004              | 0.603 |
| -60° - -30°S | -0.029             | 0.003 | 0.023              | 0.014 |

**Table S4 Slopes of the partial correlation coefficients between mean NDVI and the diurnal temperature ( $T_{max}$  and  $T_{min}$ ) in autumn for each 17-year moving window across latitudes intervals.** (The slope represents the change trend in the correlations between the vegetation greenness and diurnal warming during the period 1982–2015. A positive slope indicates a positive growth response to temperature, while a negative slope indicates a weakening relationship with diurnal warming.  $p$  indicates the statistically significance level of the change trend tested by a two-tailed  $t$ -test at the 0.05 level. N and S indicates the Northern and southern hemisphere, respectively.)

| Latitudes    | $R_{NDVI-T_{max}}$ |       | $R_{NDVI-T_{min}}$ |       |
|--------------|--------------------|-------|--------------------|-------|
|              | Slope              | $p$   | Slope              | $p$   |
| 60° - 90°N   | -0.009             | 0.213 | 0.002              | 0.830 |
| 30° - 60°N   | 0.021              | 0.009 | -0.017             | 0.043 |
| 00° - 30°N   | 0.057              | 0.000 | -0.048             | 0.000 |
| -30° - 00°S  | -0.005             | 0.260 | -0.002             | 0.622 |
| -60° - -30°S | -0.083             | 0.173 | -0.007             | 0.073 |

**Table S5 Slopes of the partial correlation coefficients between mean NDVI and the diurnal temperature ( $T_{max}$  and  $T_{min}$ ) in winter for each 17-year moving window across latitudes intervals.** (The slope represents the change trend in the correlations between the vegetation greenness and diurnal warming during the period 1982–2015. A positive slope indicates a positive growth response to temperature, while a negative slope indicates a weakening relationship with diurnal warming.  $p$  indicates the statistically significance level of the change trend tested by a two-tailed  $t$ -test at the 0.05 level. N and S indicates the Northern and southern hemisphere, respectively.)

| Latitudes    | R <sub>NDVI-Tmax</sub> |          | R <sub>NDVI-Tmin</sub> |          |
|--------------|------------------------|----------|------------------------|----------|
|              | Slope                  | <i>p</i> | Slope                  | <i>p</i> |
| 60° - 90°N   | -0.003                 | 0.787    | -0.000                 | 0.992    |
| 30° - 60°N   | 0.041                  | 0.000    | -0.036                 | 0.000    |
| 00° - 30°N   | -0.009                 | 0.069    | -0.010                 | 0.026    |
| -30° - 00°S  | 0.016                  | 0.028    | -0.025                 | 0.001    |
| -60° - -30°S | -0.025                 | 0.000    | 0.027                  | 0.000    |
